# Supplementary material
Source: PubMed Central journal article supplement (PMC1250291)

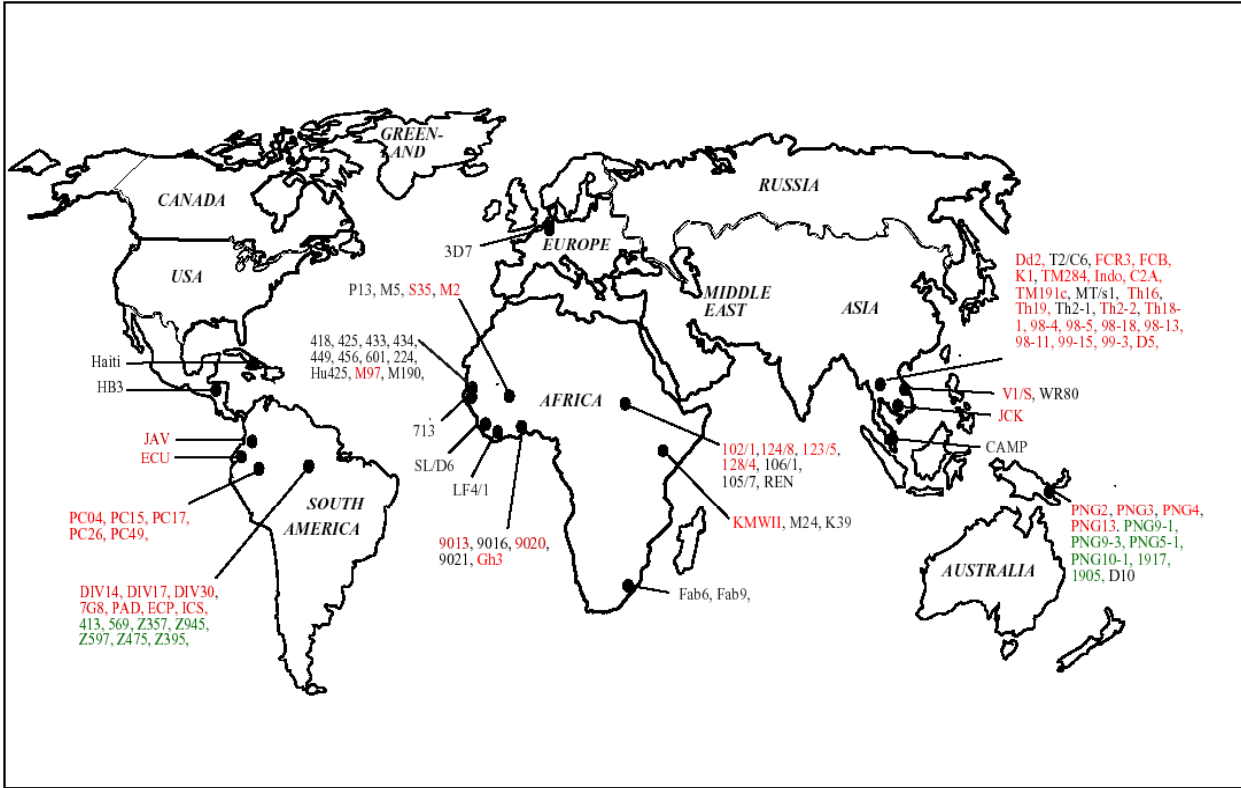

Supplement: pbio.0030335.sg001.pdf [file pbio.0030335.sg001.pdf]
